# Supplementary material for: The Outcomes and Quality of Pancreatic Islet Cells Isolated from Surgical Specimens for Research on Diabetes Mellitus
Source: MDPI journal article supplement (doi:10.3390/cells11152335), 2022-07-29
Supplement: s1 [file s1]

## Supplementary Information

**Table S1.** Donor information on islet used functional assay

### A. Mitochondrial function

| Characteristic                 | Patient 1 | Patient 2 | Patient 3 | Patient 4 |
|--------------------------------|-----------|-----------|-----------|-----------|
| Age (years)                    | 31        | 26        | 57        | 39        |
| Sex                            | Female    | Female    | Male      | Female    |
| BMI                            | 21.89     | 18.83     | 22.89     | 23.73     |
| Disease for resection          | MCN       | MCN       | SCA       | SPN       |
| Diabetes in underlying disease | No        | No        | No        | No        |
| Specimen location in Pancreas  | Tail      | Tail      | Tail      | Tail      |
| Specimen size (g)              | 21.55     | 27.61     | 24.86     | 21.56     |

### B. GSIS

| Characteristic                 | Patient 1 | Patient 2 | Patient 3 | Patient 4 |
|--------------------------------|-----------|-----------|-----------|-----------|
| Age (years)                    | 54        | 61        | 57        | 39        |
| Sex                            | Male      | Female    | Male      | Female    |
| BMI                            | 26.5      | 20.84     | 22.89     | 23.73     |
| Disease for resection          | NET       | PanIN     | SCA       | SPN       |
| Diabetes in underlying disease | No        | No        | No        | No        |
| Specimen location in Pancreas  | Tail      | Tail      | Tail      | Tail      |
| Specimen size (g)              | 46        | 21.19     | 24.86     | 21.56     |

### C. Islet transplantation

| Characteristic                 | Patient 1 | Patient 2 | Patient 3 | Patient 4 | Patient 5 |
|--------------------------------|-----------|-----------|-----------|-----------|-----------|
| Age (years)                    | 54        | 61        | 31        | 26        | 39        |
| Sex                            | Male      | Female    | Female    | Female    | Female    |
| BMI                            | 26.5      | 20.84     | 21.89     | 18.83     | 23.73     |
| Disease for resection          | NET       | PanIN     | MCN       | MCN       | SPN       |
| Diabetes in underlying disease | No        | No        | No        | No        | No        |
| Specimen location in Pancreas  | Tail      | Tail      | Tail      | Tail      | Tail      |
| Specimen size (g)              | 46        | 21.19     | 21.55     | 27.61     | 21.56     |

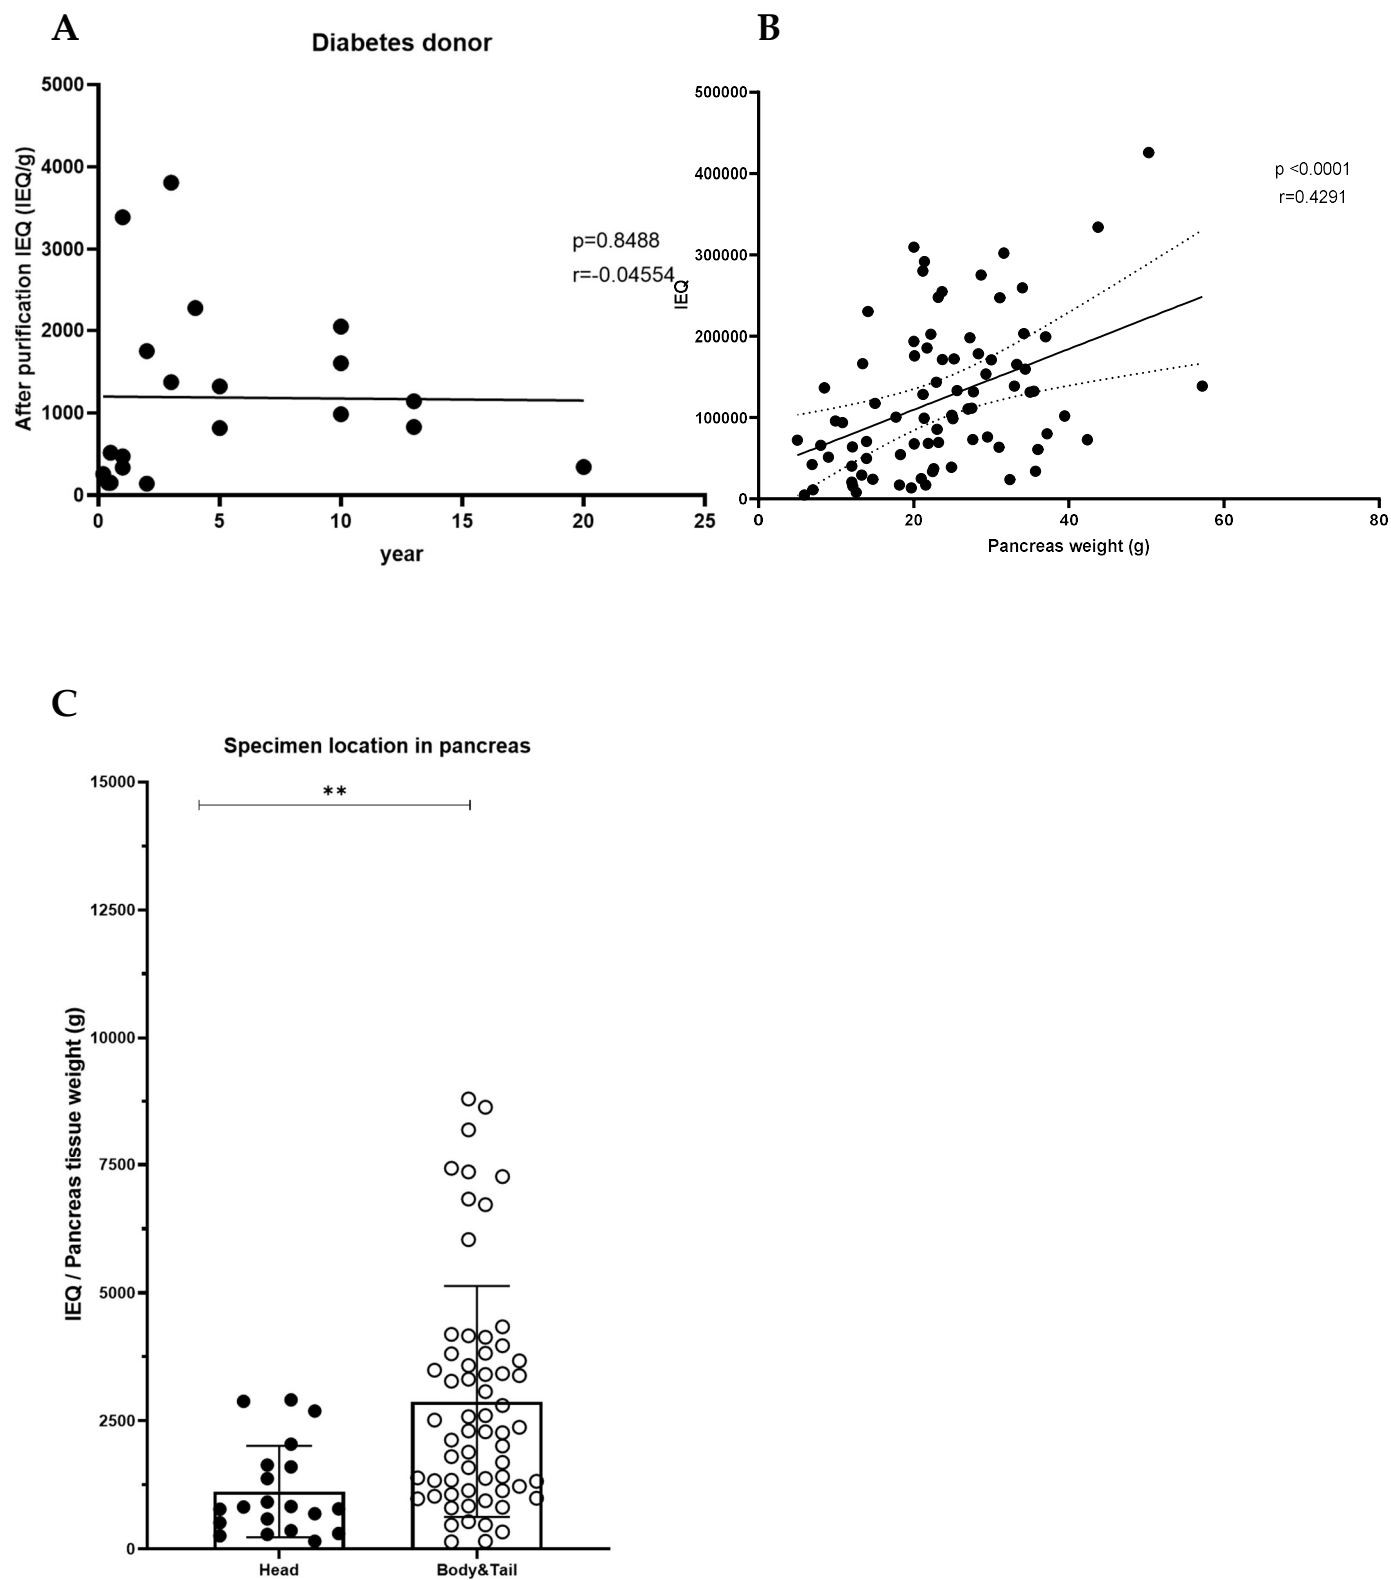

**Figure S1.** (A) Correlation between diabetes patients and islet cell isolation efficiency (n=19). (B) Correlation between pancreatic weight and islet cell isolation efficiency (n=82). (C) Islet cell isolation efficiency by pancreatic region (n=82) \*\*  $p < 0.01$ .
